# Supplementary material for: Discovery of anti-Ebola drugs: a computational drug repositioning case study
Source: Royal Society of Chemistry journal article supplement (doi:10.1039/c6ra01704e), 2016-01-01
Supplement: c6ra01704e1.pdf [file c6ra01704e1.pdf]

## Discovery of Anti-Ebola Drugs: A Computational Drug Repositioning Case Study

Prashant S. Kharkar<sup>1\*</sup>, Ponnadurai Ramasami<sup>2</sup>, Yee Siew Choong<sup>3</sup>, Lydia Rhyman<sup>2</sup> and Sona

Warrier<sup>1</sup>

<sup>1</sup>SPP School of Pharmacy and Technology Management, SVKM's NMIMS,

V. L. Mehta Road, Vile Parle (West), Mumbai-400 056. INDIA.

<sup>2</sup>Computational Chemistry Group, Department of Chemistry, Faculty of Science,

University of Mauritius, Réduit 80837, Mauritius

<sup>3</sup>Institute for Research in Molecular Medicine (INFORMM), Universiti Sains Malaysia,  
Malaysia

### Contents

| <b>Sr. No.</b> | <b>Description</b> | <b>Page No.</b> |
|----------------|--------------------|-----------------|
| 1              | Table 1S           | 1               |
| 2              | Figure 1S          | 28              |
| 3              | Figure 2S          | 29              |
| 4              | Figure 3S          | 30              |
| 5              | Figure 4S          | 31              |
| 6              | Figure 5S          | 32              |

**Table 1S.** Top hits (#100) identified from EON screening using query 1

| Sr. No. | Drug       | Structure                                                                          | ET_pb | ET_coul | ET_combo | EON_Shape Tanimoto | Rank | Estimated Free Energy of Binding (kcal/mol) |
|---------|------------|------------------------------------------------------------------------------------|-------|---------|----------|--------------------|------|---------------------------------------------|
| 1       | 1          | 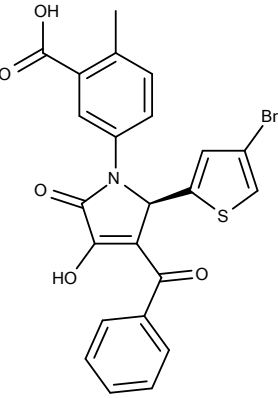  |       |         |          |                    |      | -9.88                                       |
| 2       | Sitaxentan |  | 0.633 | 0.914   | 0.926    | 0.294              | 1    | -14.37                                      |

|   |                           |                                                                                      |       |       |       |       |   |        |
|---|---------------------------|--------------------------------------------------------------------------------------|-------|-------|-------|-------|---|--------|
| 3 | Alitretinoin <sup>a</sup> | 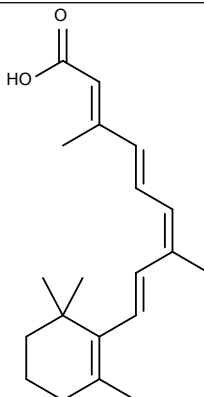    | 0.66  | 0.91  | 0.906 | 0.246 | 2 | -3.91  |
| 4 | Ceftriaxone               |   | 0.606 | 0.937 | 0.823 | 0.217 | 3 | -12.33 |
| 5 | Acitretin <sup>a</sup>    |  | 0.637 | 0.936 | 0.809 | 0.172 | 4 | -3.71  |
| 6 | Cidofovir                 |   | 0.473 | 0.633 | 0.783 | 0.31  | 5 | -4.21  |

|    |                          |                                                                                     |       |       |       |       |   |        |
|----|--------------------------|-------------------------------------------------------------------------------------|-------|-------|-------|-------|---|--------|
| 7  | Telmisartan              | 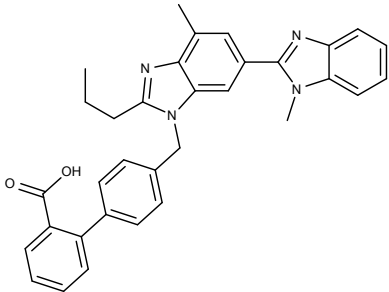   | 0.601 | 0.908 | 0.775 | 0.174 | 6 | -6.46  |
| 8  | Nateglinide <sup>a</sup> |    | 0.54  | 0.874 | 0.745 | 0.205 | 7 | -3.78  |
| 9  | Ceftizoxime              |    | 0.557 | 0.88  | 0.735 | 0.178 | 8 | -11.35 |
| 10 | Treprostinil             |  | 0.432 | 0.846 | 0.732 | 0.301 | 9 | -3.41  |

|    |                           |                                                                                    |       |       |       |       |    |       |
|----|---------------------------|------------------------------------------------------------------------------------|-------|-------|-------|-------|----|-------|
| 11 | Tenoxicam                 | 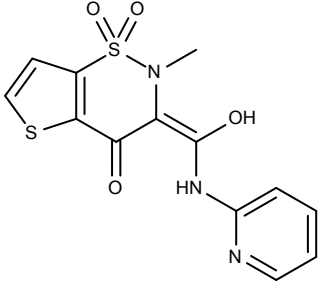  | 0.367 | 0.817 | 0.71  | 0.343 | 10 | -7.86 |
| 12 | Dicoumarol                |   | 0.368 | 0.615 | 0.663 | 0.295 | 11 | -6.06 |
| 13 | Ethacrynic acid           |   | 0.478 | 0.847 | 0.656 | 0.177 | 12 | -4.13 |
| 14 | Chlorambucil <sup>a</sup> |  | 0.466 | 0.867 | 0.646 | 0.18  | 13 | -3.14 |

|    |             |                                                                                    |       |       |       |       |    |        |
|----|-------------|------------------------------------------------------------------------------------|-------|-------|-------|-------|----|--------|
| 15 | Ticarcillin | 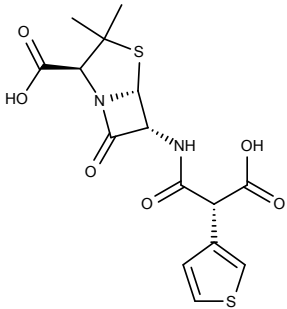  | 0.52  | 0.664 | 0.643 | 0.123 | 14 | -17.89 |
| 16 | Nitroxoline |   | 0.41  | 0.824 | 0.641 | 0.232 | 15 | -5.31  |
| 17 | Nedocromil  |   | 0.321 | 0.603 | 0.637 | 0.316 | 16 | -4.2   |
| 18 | Aztreonam   |  | 0.417 | 0.609 | 0.636 | 0.219 | 17 | -5.13  |

|    |                         |                                                                                     |       |       |       |       |    |       |
|----|-------------------------|-------------------------------------------------------------------------------------|-------|-------|-------|-------|----|-------|
| 19 | Bexarotene <sup>a</sup> | 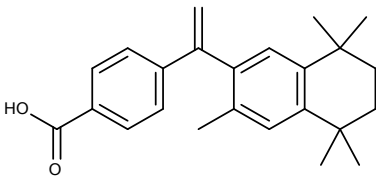   | 0.381 | 0.862 | 0.616 | 0.235 | 18 | -4.58 |
| 20 | Olmesartan              |    | 0.375 | 0.593 | 0.611 | 0.237 | 19 | -6.28 |
| 21 | Aspartame               |    | 0.284 | 0.118 | 0.605 | 0.32  | 20 | -3.59 |
| 22 | Cinoxacin               |   | 0.313 | 0.748 | 0.604 | 0.29  | 21 | -5.66 |
| 23 | Minocycline             |  | 0.346 | 0.602 | 0.594 | 0.248 | 22 | -4.65 |

|    |                          |                                                                                     |       |       |       |       |    |        |
|----|--------------------------|-------------------------------------------------------------------------------------|-------|-------|-------|-------|----|--------|
| 24 | Sparfloxacin             | 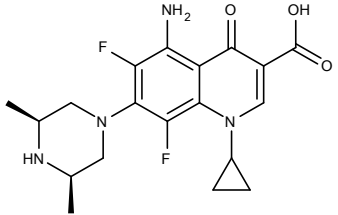   | 0.156 | 0.061 | 0.591 | 0.435 | 23 | -5.06  |
| 25 | Ceftibuten               |    | 0.26  | 0.533 | 0.589 | 0.329 | 24 | -14.71 |
| 26 | Pemetrexed               |   | 0.538 | 0.609 | 0.588 | 0.051 | 25 | -4.95  |
| 27 | Fludarabine              |   | 0.365 | 0.58  | 0.588 | 0.223 | 26 | -5.53  |
| 28 | Repaglinide <sup>a</sup> |  | 0.41  | 0.832 | 0.574 | 0.164 | 27 | -5.61  |



|    |                          |                                                                                    |       |       |       |       |    |       |
|----|--------------------------|------------------------------------------------------------------------------------|-------|-------|-------|-------|----|-------|
| 29 | Sulfacytine              | 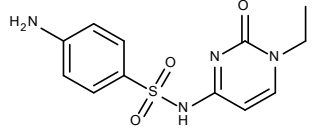  | 0.303 | 0.768 | 0.573 | 0.27  | 28 | -4.09 |
| 30 | Fluvastatin <sup>b</sup> |   | 0.335 | 0.788 | 0.568 | 0.233 | 29 | -3.53 |
| 31 | Ribavirin                |   | 0.216 | 0.072 | 0.561 | 0.345 | 30 | -4.52 |
| 32 | Pitavastatin             |  | 0.46  | 0.861 | 0.558 | 0.098 | 31 | -3.74 |

|    |                        |                                                                                     |       |       |       |       |    |       |
|----|------------------------|-------------------------------------------------------------------------------------|-------|-------|-------|-------|----|-------|
| 33 | Fosaprepitant          | 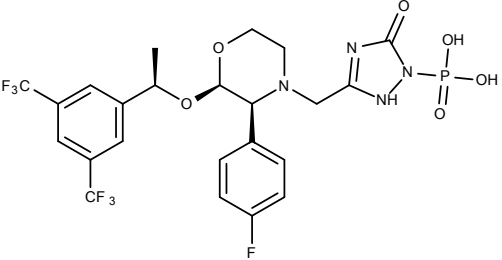  | 0.43  | 0.743 | 0.552 | 0.121 | 32 | -5.64 |
| 34 | Cilazapril             |    | 0.276 | 0.144 | 0.544 | 0.268 | 33 | -5.47 |
| 35 | Tenofovir <sup>c</sup> |   | 0.373 | 0.611 | 0.543 | 0.17  | 34 | -5.65 |
| 36 | Atovaquone             |  | 0.285 | 0.752 | 0.536 | 0.251 | 35 | -5.07 |

|    |                  |                                                                                    |       |       |       |       |    |        |
|----|------------------|------------------------------------------------------------------------------------|-------|-------|-------|-------|----|--------|
| 37 | Sulfadimethoxine | 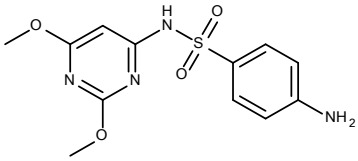  | 0.28  | 0.746 | 0.536 | 0.256 | 36 | -4.39  |
| 38 | Cyclacillin      |   | 0.189 | 0.127 | 0.531 | 0.341 | 37 | -14.26 |
| 39 | Demeclocycline   |   | 0.223 | 0.523 | 0.53  | 0.306 | 38 | -4.44  |
| 40 | Fosphenytoin     |  | 0.395 | 0.593 | 0.529 | 0.134 | 39 | -5.3   |

|    |              |                                                                                    |       |       |       |       |    |       |
|----|--------------|------------------------------------------------------------------------------------|-------|-------|-------|-------|----|-------|
| 41 | Tigecycline  | 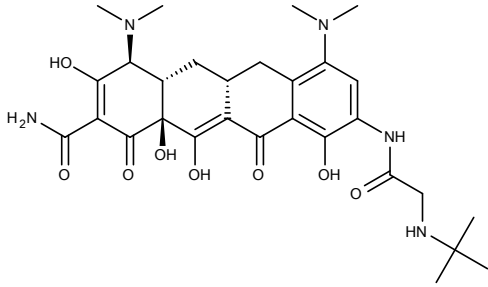 | 0.314 | 0.688 | 0.528 | 0.214 | 40 | -5.24 |
| 42 | Fosfomicin   |   | 0.322 | 0.57  | 0.526 | 0.204 | 41 | -4.1  |
| 43 | Penicillin V |  | 0.394 | 0.804 | 0.518 | 0.125 | 42 | -8.79 |
| 44 | Sulfadoxine  |  | 0.261 | 0.735 | 0.516 | 0.254 | 43 | -4.37 |

|    |                 |                                                                                                                                                                                                                                                                                                                                                                                                                                             |       |       |       |       |    |       |
|----|-----------------|---------------------------------------------------------------------------------------------------------------------------------------------------------------------------------------------------------------------------------------------------------------------------------------------------------------------------------------------------------------------------------------------------------------------------------------------|-------|-------|-------|-------|----|-------|
| 45 | Tasosartan      | 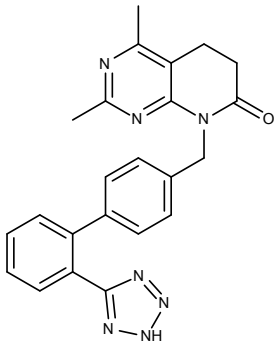 <p>The structure of Tasosartan consists of a 1,2,3,4-tetrahydroquinazolin-2(1H)-one ring system with methyl groups at positions 4 and 7. This is connected via a methylene bridge to a para-substituted benzene ring, which is further linked to a biphenyl system. The biphenyl system has a 1,2,4-triazole ring attached to the second phenyl ring.</p> | 0.396 | 0.733 | 0.515 | 0.12  | 44 | -7.76 |
| 46 | Regadenoson     |  <p>The structure of Regadenoson features a ribose sugar moiety attached to a 2,6-diaminopyrimidine ring. The pyrimidine ring is further substituted with a 1,2,4-triazole ring, which is in turn connected to a 5-methyl-1H-imidazole ring. A methylamino group is attached to the 4-position of the imidazole ring.</p>                                 | 0.168 | 0.054 | 0.514 | 0.346 | 45 | -5.17 |
| 47 | Oxytetracycline |  <p>The structure of Oxytetracycline is a tetracycline derivative. It features a tetracycline core with a dimethylamino group at the 4-position and a primary amide group at the 7-position. The molecule is highly substituted with hydroxyl groups at various positions, including the 2, 3, 4, 5, 6, and 7 positions.</p>                              | 0.208 | 0.518 | 0.514 | 0.306 | 46 | -3.83 |

|    |                |                                                                                    |       |       |       |       |    |        |
|----|----------------|------------------------------------------------------------------------------------|-------|-------|-------|-------|----|--------|
| 48 | Pazopanib      | 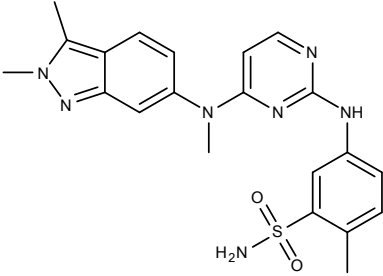  | 0.25  | 0.081 | 0.506 | 0.257 | 47 | -7.35  |
| 49 | Captopril      |   | 0.331 | 0.8   | 0.506 | 0.175 | 48 | -16.74 |
| 50 | Chlorpropamide |   | 0.263 | 0.7   | 0.503 | 0.24  | 49 | -4.1   |
| 51 | Furosemide     |  | 0.269 | 0.758 | 0.497 | 0.228 | 50 | -4.58  |

|    |                           |                                                                                     |       |       |       |       |    |       |
|----|---------------------------|-------------------------------------------------------------------------------------|-------|-------|-------|-------|----|-------|
| 52 | Rosuvastatin <sup>b</sup> | 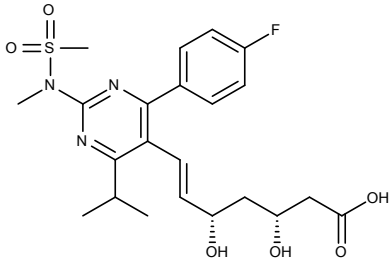   | 0.41  | 0.855 | 0.496 | 0.086 | 51 | -3.05 |
| 53 | Sulfamethizole            |    | 0.36  | 0.763 | 0.496 | 0.136 | 52 | -5.27 |
| 54 | Zoledronate               |    | 0.135 | 0.268 | 0.496 | 0.361 | 53 | -4.38 |
| 55 | Sulfacetamide             |  | 0.356 | 0.761 | 0.493 | 0.136 | 54 | -4.1  |

|    |                            |                                                                                    |       |       |       |       |    |        |
|----|----------------------------|------------------------------------------------------------------------------------|-------|-------|-------|-------|----|--------|
| 56 | Ascorbic acid <sup>d</sup> | 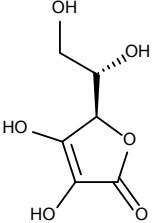  | 0.231 | 0.758 | 0.492 | 0.262 | 55 | -2.86  |
| 57 | Azidocillin                |   | 0.366 | 0.808 | 0.486 | 0.12  | 56 | -13.11 |
| 58 | Naproxen                   |   | 0.28  | 0.77  | 0.486 | 0.206 | 57 | -3.87  |
| 59 | Sulfathiazole              |  | 0.343 | 0.75  | 0.48  | 0.138 | 58 | -6.59  |



|    |                             |                                                                                     |       |       |       |       |    |       |
|----|-----------------------------|-------------------------------------------------------------------------------------|-------|-------|-------|-------|----|-------|
| 60 | Beclomethasone <sup>a</sup> | 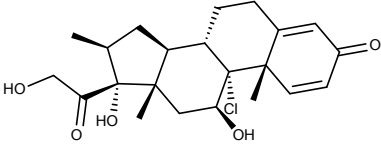   | 0.139 | 0.011 | 0.479 | 0.341 | 59 | -3.45 |
| 61 | Cefacetrile                 |   | 0.246 | 0.724 | 0.477 | 0.231 | 60 | -8.14 |
| 62 | Cefmenoxime                 |    | 0.276 | 0.741 | 0.476 | 0.2   | 61 | -8.23 |
| 63 | Entacapone                  |  | 0.301 | 0.748 | 0.473 | 0.172 | 62 | -4.87 |

|    |              |                                                                                    |       |       |       |       |    |        |
|----|--------------|------------------------------------------------------------------------------------|-------|-------|-------|-------|----|--------|
| 64 | Tetracycline | 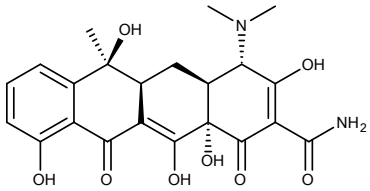  | 0.212 | 0.514 | 0.472 | 0.26  | 63 | -4.58  |
| 65 | Clomocycline |  | 0.224 | 0.525 | 0.472 | 0.248 | 64 | -4.04  |
| 66 | Balsalazide  |  | 0.34  | 0.602 | 0.472 | 0.132 | 65 | -4.57  |
| 67 | Cefalotin    |  | 0.258 | 0.735 | 0.471 | 0.214 | 66 | -13.17 |

|    |                           |                                                                                     |       |       |       |       |    |       |
|----|---------------------------|-------------------------------------------------------------------------------------|-------|-------|-------|-------|----|-------|
| 68 | Ethynodiol <sup>a</sup>   | 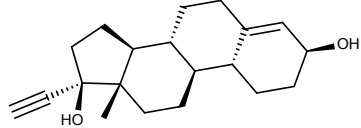   | 0.071 | 0.011 | 0.471 | 0.4   | 67 | -4.9  |
| 69 | Sulfamethoxazole          |    | 0.348 | 0.761 | 0.469 | 0.121 | 68 | -4.62 |
| 70 | Epoprostenol <sup>a</sup> |   | 0.123 | 0.599 | 0.468 | 0.345 | 69 | -3.69 |
| 71 | Gemfibrozil <sup>a</sup>  |  | 0.378 | 0.804 | 0.467 | 0.089 | 70 | -3.29 |

|    |               |                                                                                     |       |       |       |       |    |        |
|----|---------------|-------------------------------------------------------------------------------------|-------|-------|-------|-------|----|--------|
| 72 | Sulfisoxazole | 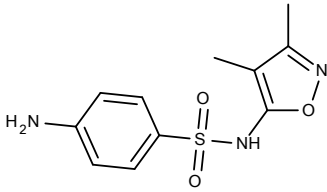   | 0.348 | 0.755 | 0.466 | 0.119 | 71 | -5.03  |
| 73 | Amdinocillin  |    | 0.246 | 0.102 | 0.466 | 0.219 | 72 | -14.25 |
| 74 | Besifloxacin  |   | 0.05  | 0.011 | 0.464 | 0.414 | 73 | -4.99  |
| 75 | Tazobactam    |  | 0.114 | 0.621 | 0.463 | 0.349 | 74 | -4.91  |

|    |               |                                                                                      |       |       |       |       |    |        |
|----|---------------|--------------------------------------------------------------------------------------|-------|-------|-------|-------|----|--------|
| 76 | Sulfapyridine | 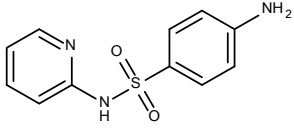    | 0.338 | 0.751 | 0.462 | 0.124 | 75 | -4.08  |
| 77 | Cefazolin     |     | 0.262 | 0.741 | 0.462 | 0.2   | 76 | -14.78 |
| 78 | Sulfadiazine  |     | 0.206 | 0.688 | 0.46  | 0.254 | 77 | -4.57  |
| 79 | Sulfisoxazole |    | 0.328 | 0.745 | 0.456 | 0.129 | 78 | -4.76  |
| 80 | Cefapirin     |  | 0.27  | 0.737 | 0.455 | 0.186 | 79 | -13.38 |

|    |                   |                                                                                     |       |       |       |       |    |        |
|----|-------------------|-------------------------------------------------------------------------------------|-------|-------|-------|-------|----|--------|
| 81 | Ceforanide        | 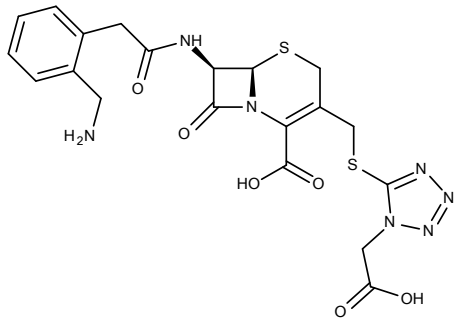  | 0.257 | 0.649 | 0.454 | 0.197 | 80 | -13.58 |
| 82 | Sulfamerazine     |    | 0.306 | 0.729 | 0.454 | 0.148 | 81 | -4.81  |
| 83 | Sulfametopyrazine |    | 0.335 | 0.743 | 0.453 | 0.118 | 82 | -4.82  |
| 84 | Cefmetazole       |  | 0.236 | 0.731 | 0.451 | 0.215 | 83 | -23.15 |

|    |                               |                                                                                      |       |       |       |       |    |        |
|----|-------------------------------|--------------------------------------------------------------------------------------|-------|-------|-------|-------|----|--------|
| 85 | Cefuroxime                    | 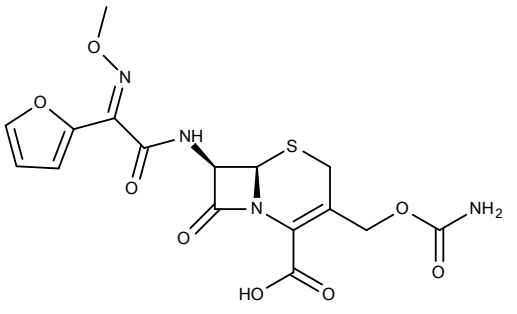   | 0.274 | 0.735 | 0.45  | 0.175 | 84 | -6.87  |
| 86 | Benzympenicillin <sup>e</sup> |     | 0.32  | 0.792 | 0.448 | 0.128 | 85 | -13.71 |
| 87 | Adenosine <sup>f</sup>        |    | 0.089 | 0.034 | 0.445 | 0.356 | 86 | -4.48  |
| 88 | Cefotaxime                    |  | 0.267 | 0.738 | 0.445 | 0.178 | 87 | -13.25 |

|    |             |                                                                                     |       |       |       |       |    |       |
|----|-------------|-------------------------------------------------------------------------------------|-------|-------|-------|-------|----|-------|
| 89 | Bezafibrate | 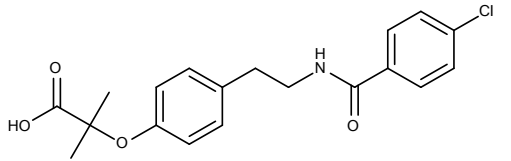  | 0.351 | 0.752 | 0.443 | 0.092 | 88 | -4.61 |
| 90 | Gemcitabine |    | 0.043 | 0.013 | 0.442 | 0.399 | 89 | -3.54 |
| 91 | Cefotetan   |    | 0.238 | 0.593 | 0.44  | 0.202 | 90 | -5.73 |
| 92 | Cefoxitin   |  | 0.233 | 0.722 | 0.439 | 0.206 | 91 | -9.02 |



|    |                  |                                                                                     |       |       |       |       |    |       |
|----|------------------|-------------------------------------------------------------------------------------|-------|-------|-------|-------|----|-------|
| 93 | Sulfaphenazole   | 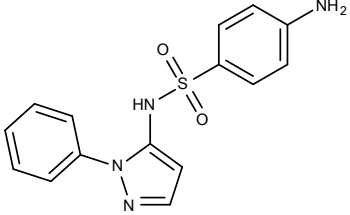   | 0.225 | 0.671 | 0.439 | 0.214 | 92 | -5.05 |
| 94 | Sulfamethazine   |    | 0.241 | 0.685 | 0.432 | 0.19  | 93 | -4.94 |
| 95 | Cromoglicic acid |   | 0.198 | 0.559 | 0.426 | 0.228 | 94 | -4.6  |
| 96 | Topiramate       |  | 0.055 | 0.004 | 0.426 | 0.37  | 95 | 4.8   |

|     |                            |                                                                                     |       |       |       |       |    |        |
|-----|----------------------------|-------------------------------------------------------------------------------------|-------|-------|-------|-------|----|--------|
| 97  | Alclometasone <sup>a</sup> | 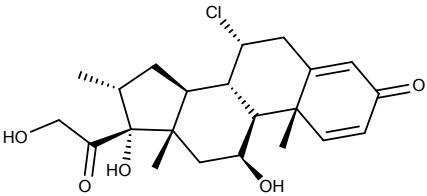  | 0.104 | 0.002 | 0.423 | 0.32  | 96 | -4.26  |
| 98  | Doxycycline <sup>g</sup>   |    | 0.117 | 0.456 | 0.423 | 0.307 | 97 | -4.41  |
| 99  | Danazol <sup>a,b</sup>     |    | 0.125 | 0.028 | 0.422 | 0.297 | 98 | -5.85  |
| 100 | Piperacillin               |  | 0.313 | 0.796 | 0.42  | 0.107 | 99 | -10.16 |

<sup>a</sup>Approved and experimental drugs selected as candidate for treatment of EVD [Veljkovic, V.; Loiseau, P.; Figadere, B. Virtual screen for repurposing approved and experimental drugs for candidate inhibitors of EBOLA virus infection. *F1000Research* **2015**, 4:34]

<sup>b</sup> [US Pat. 8475804]

<sup>c</sup> [<http://www.virology.ws/2014/10/09/treatment-of-ebola-virus-infection-with-brincidofovir/>]

<sup>d</sup> [<http://scienceblogs.com/insolence/2014/09/05/high-dose-vitamin-c-can-cure-ebola-virus-disease-not-so-fast/>]

<sup>e</sup> [<http://naturalsociety.com/ebola-scientists-discover-first-virological-penicillin-honeysuckle/>]

<sup>f</sup> [Bray, M.; Driscoll, J.; Huggins, JW. Treatment of lethal Ebola virus infection in mice with a single dose of an S-adenosyl-L-homocysteine hydrolase inhibitor. *Antiviral Res.* **2000**, *5*, 135-147.]

<sup>g</sup> [CDC Morbidity and Mortality Weekly Report (MMWR), June 27, 2014, Vol. 63(25)]

**Property plots showing distribution of molecular and physicochemical properties in top-ranking hits (#100) obtained from EON screening**

The property plots have been generated using Canvas version 1.6 as implemented in Schrödinger Suite 2013-1 (one-month trial version licensed to PSK).

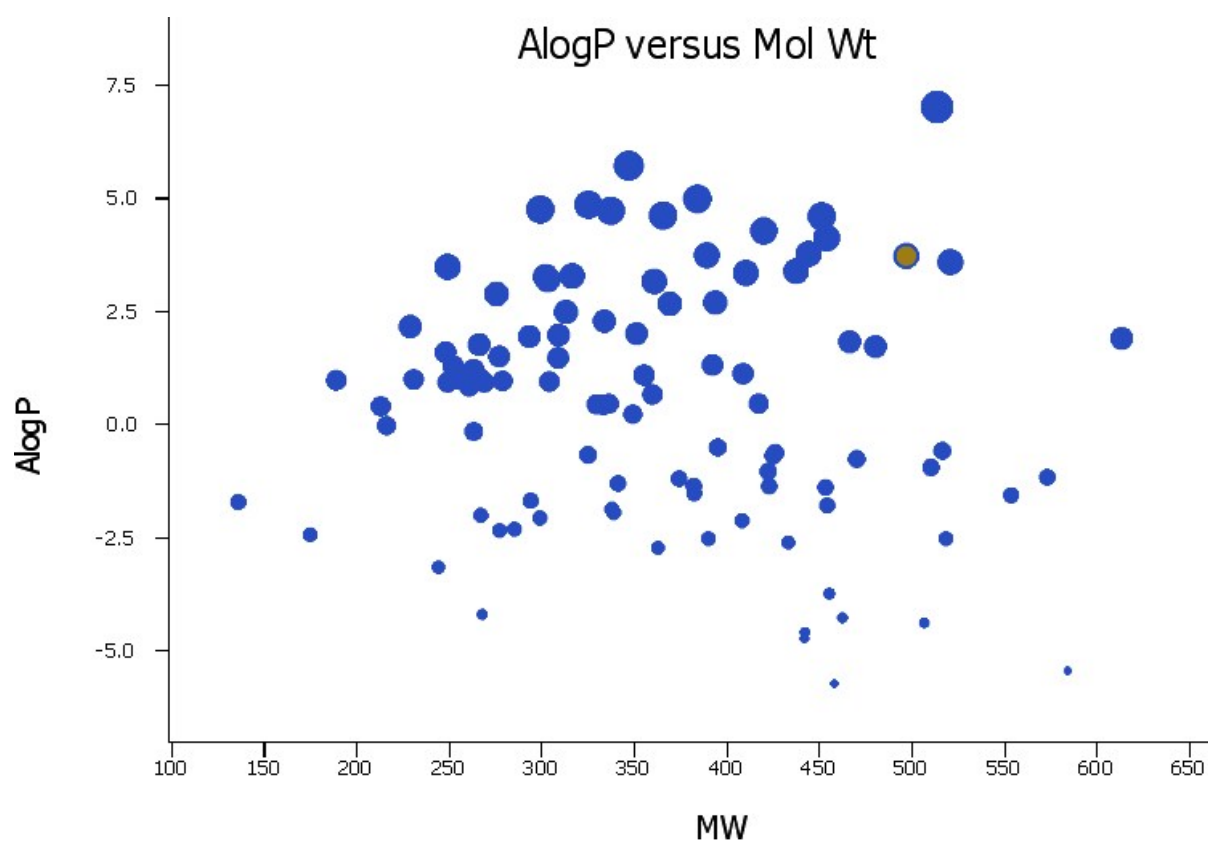

**Figure 1S.** Scatter plot of AlogP versus MW for top 100 hits obtained using Query 1 (brown circle). The size of the circle varies with AlogP value.

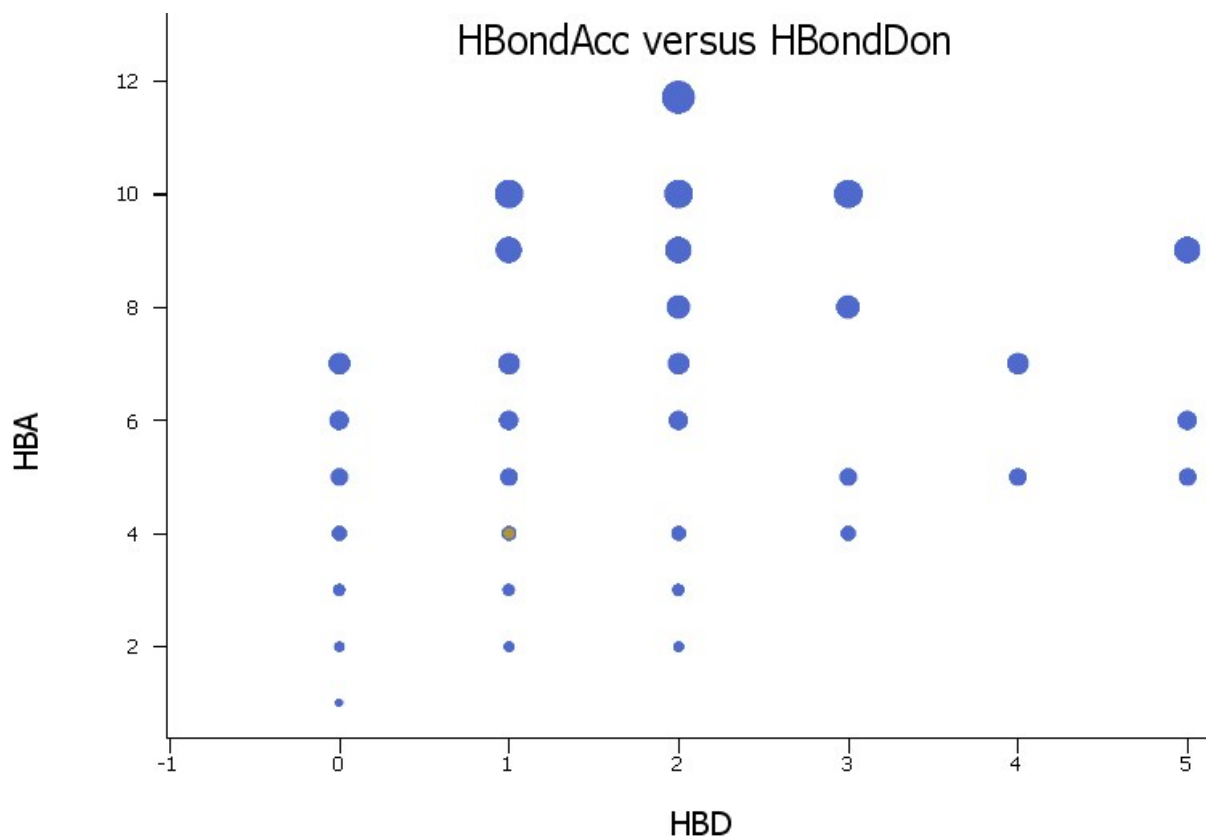

**Figure 2S.** Scatter plot of #HBondAcc (HBA) versus #HBondDon (HBD) for top 100 hits obtained using Query 1 (brown circle). The size of the circle varies with HBA value.

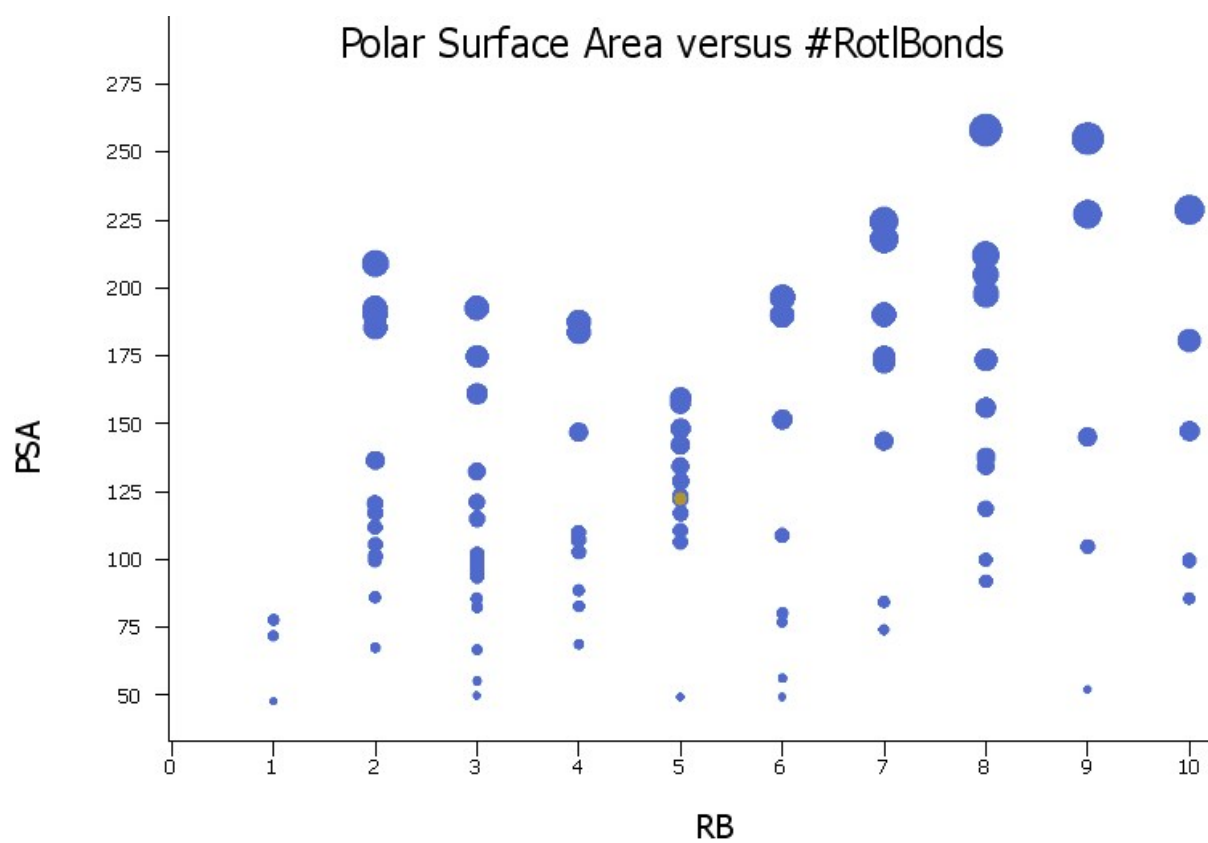

**Figure 3S.** Scatter plot of Polar Surface Area (PSA) versus #RotlBonds (RB) for top 100 hits obtained using Query 1 (brown circle). The size of the circle varies with PSA value.

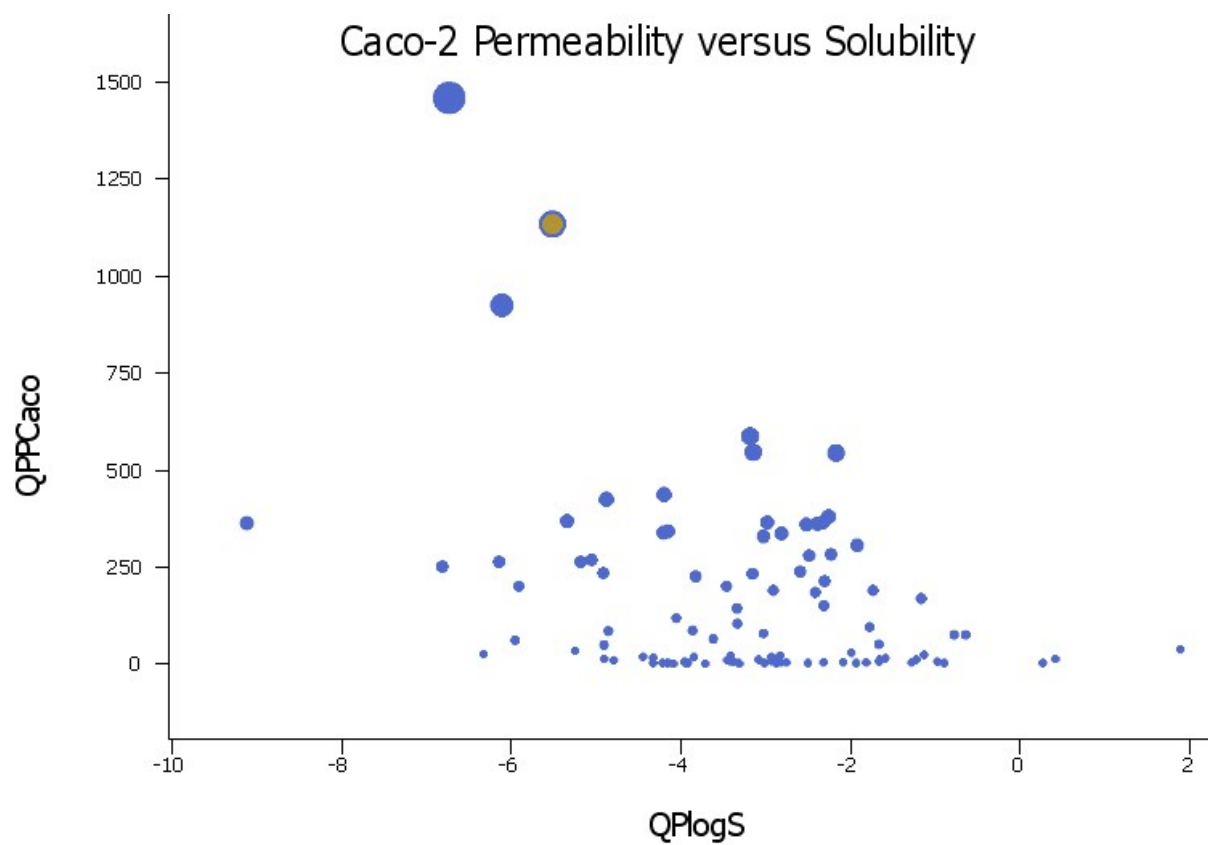

**Figure 4S.** Scatter plot of Predicted Caco-2 Permeability versus log Solubility for top 100 hits obtained using Query 1 (brown circle). The size of the circle varies with PSA value.

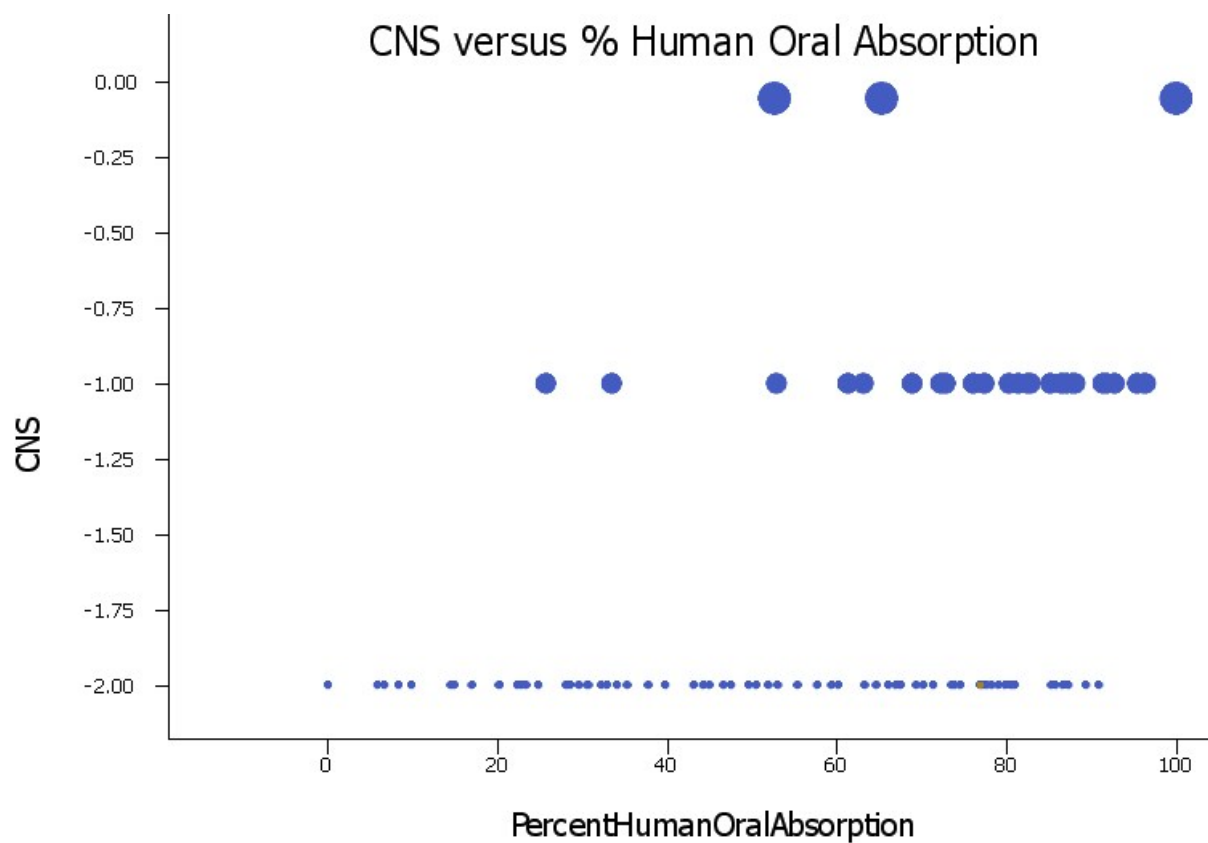

**Figure 5S.** Scatter plot of Predicted CNS Permeation versus % Human Oral Absorption for top 100 hits obtained using Query 1 (brown circle). The size of the circle varies with PSA value.
